# Supplementary material
Source: PubMed Central journal article supplement (PMC3038590)

# Supplementary Figure S1

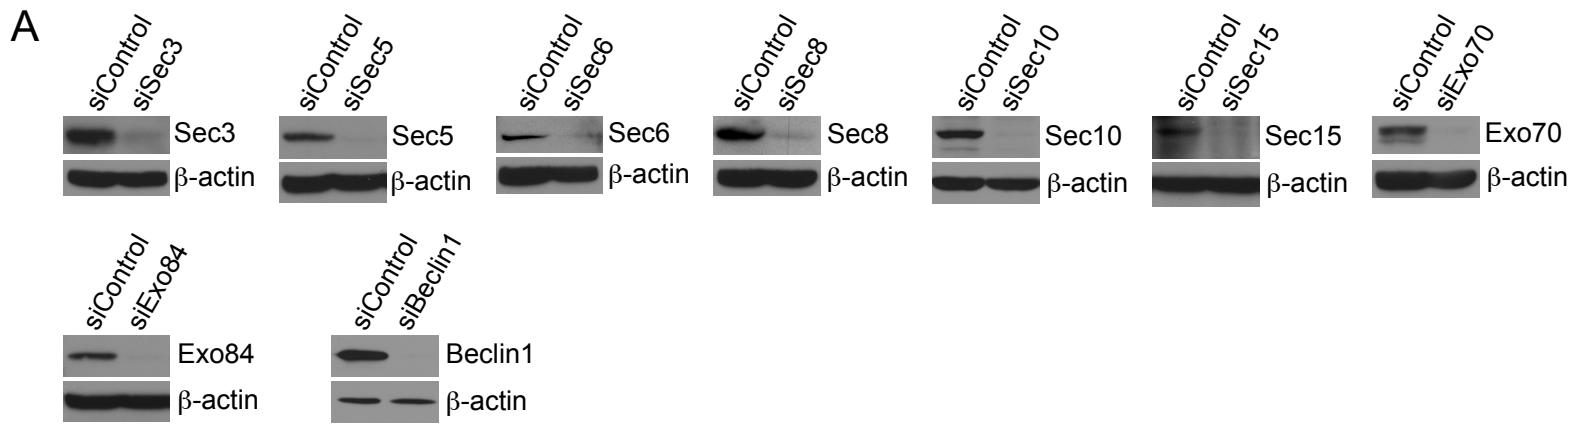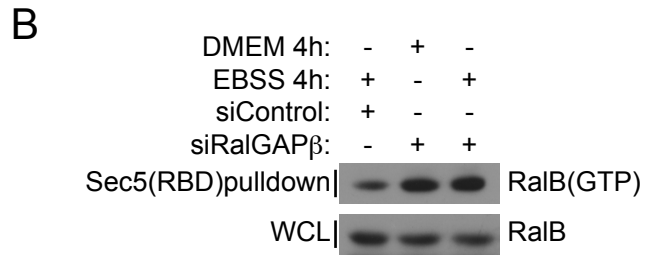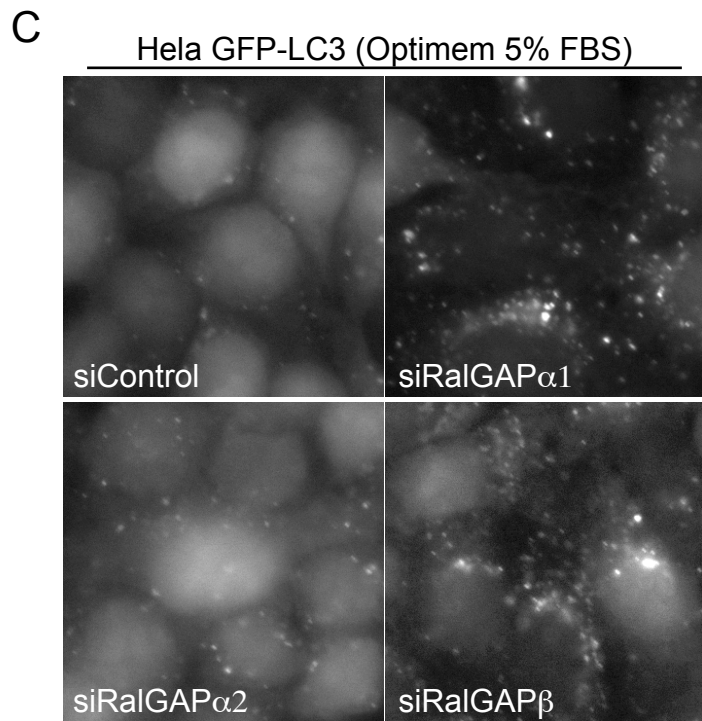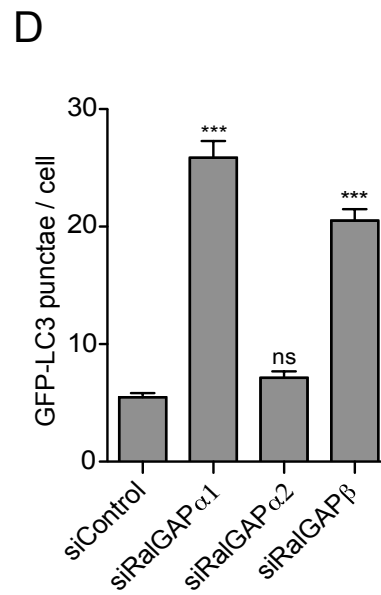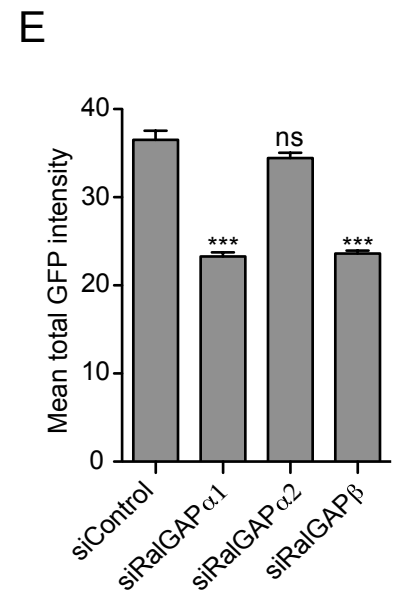

Supplementary Figure S2

A

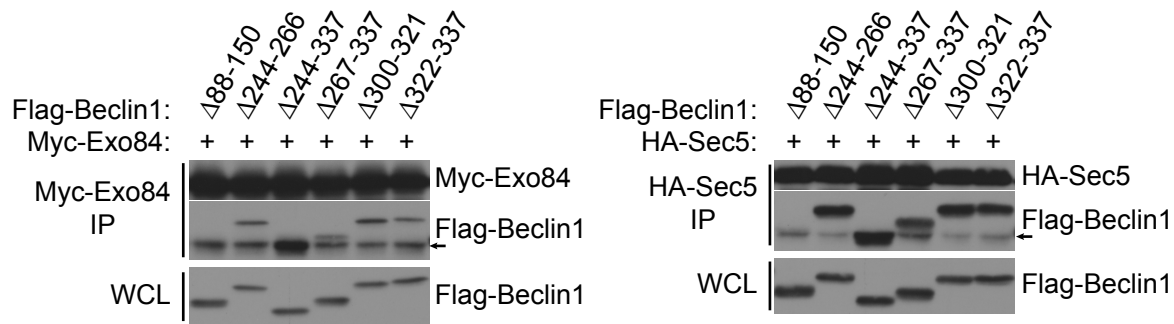

B

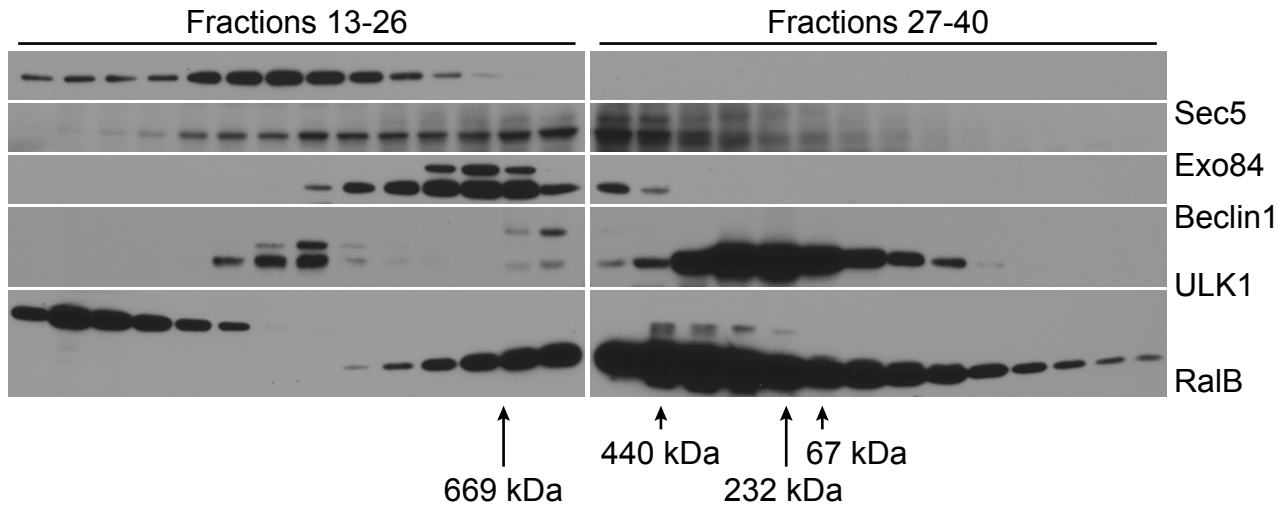

C

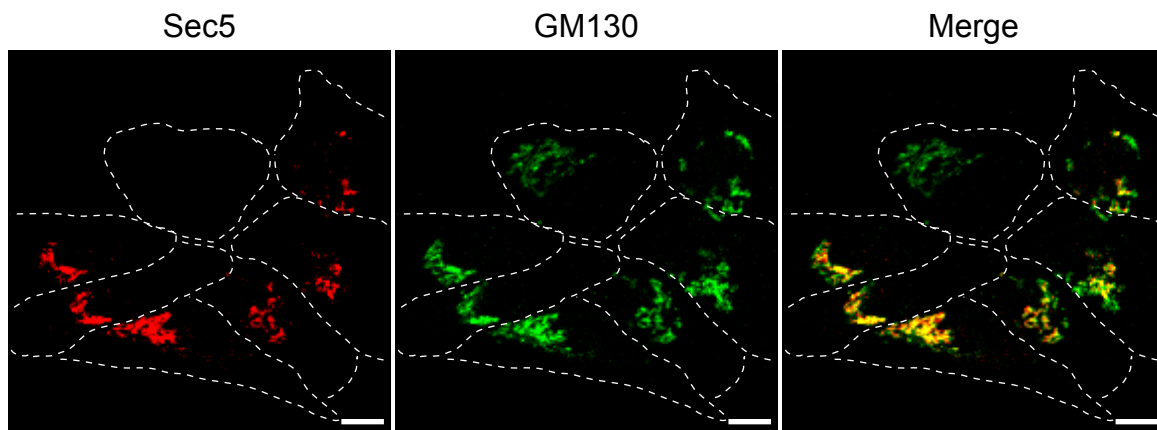

# Supplementary Figure S3

**A**

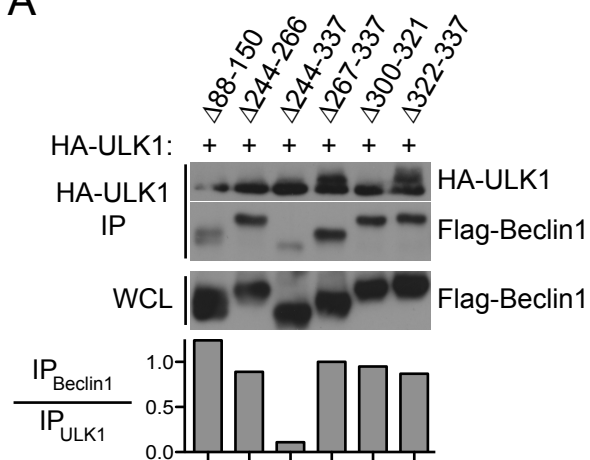

**B**

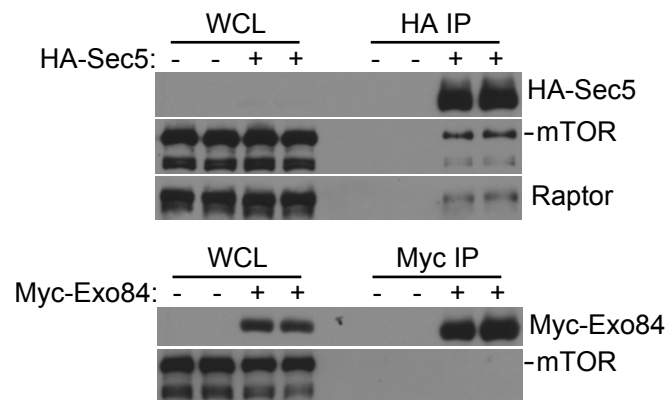

**C**

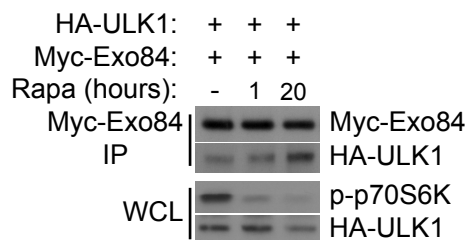

**D**

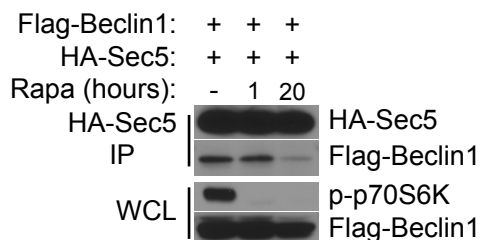

Supplement: NIHMS260687-supplement-02.pdf [file NIHMS260687-supplement-02.pdf]
